# Supplementary material for: Sub-analysis of geographical variations in the 2-year observational COPTIMIZE trial of patients with relapsing–remitting multiple sclerosis converting to glatiramer acetate
Source: Springer Nature journal article supplement (doi:10.1186/s12883-015-0448-4), 2015-10-08

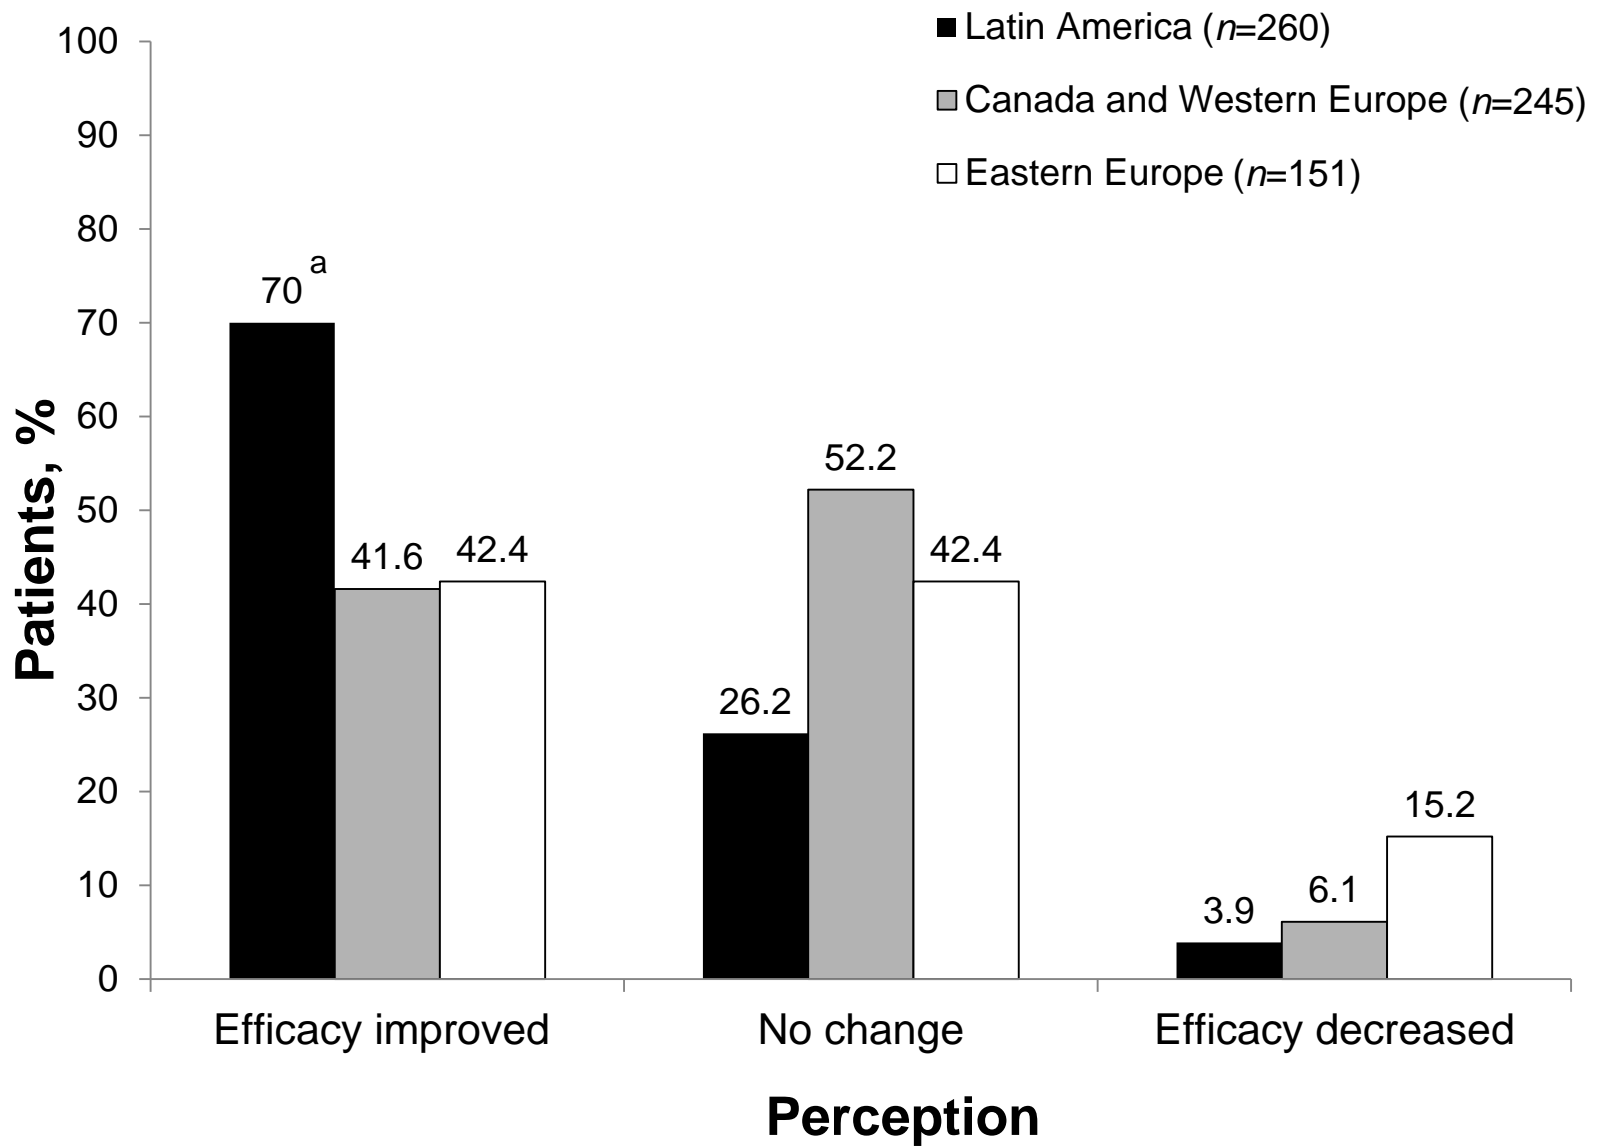

Supplement: MOESM1 [file 9742586]
